# Supplementary material
Source: publisher figshare collection journal article supplement (https://asha.figshare.com/articles/dataset/_/16959388)
Supplement: Supplementary file 2 [file 2]

**Supplemental Table S6.** Results of the meta-regression analyses on generalization outcomes.

| Moderator                            | Coefficient ( $\beta$ ) | 95% CI                | <i>p</i> value |
|--------------------------------------|-------------------------|-----------------------|----------------|
| <b>Participant-related</b>           |                         |                       |                |
| Mean age                             | -0.08                   | [-0.19; 0.03]         | .11            |
| <b>L2 proficiency</b>                |                         |                       |                |
| Advanced (reference)                 | 0.43                    | [-1.32; 2.18]         | .57            |
| Intermediate                         | -0.08                   | [-1.92; 1.75]         | .92            |
| Beginner                             | -0.06                   | [-1.88; 1.77]         | .94            |
| <b>L1</b>                            |                         |                       |                |
| Chinese (reference)                  | 0.24                    | [-0.32; 0.80]         | .35            |
| English                              | 0.18                    | [-0.49; 0.85]         | .54            |
| <b>Methodology-related</b>           |                         |                       |                |
| <b>Target phone</b>                  |                         |                       |                |
| Tone (reference)                     | 0.37                    | [-0.08; 0.82]         | .10            |
| Vowel                                | -0.002                  | [-0.65; 0.64]         | .99            |
| <b>Target language</b>               |                         |                       |                |
| Artificial tone language (reference) | 0.79                    | [0.09; 1.50]          | .03            |
| Chinese                              | -0.65                   | [-1.51; 0.22]         | .11            |
| English                              | -0.55                   | [-1.44; 0.33]         | .17            |
| French                               | -0.20                   | [-1.19; 0.80]         | .63            |
| <b>Training task type</b>            |                         |                       |                |
| Identification (reference)           | 0.42                    | [0.06; 0.78]          | .03            |
| Passive listening                    | -0.21                   | [-0.90; 0.49]         | .50            |
| <b>Training stimulus type</b>        |                         |                       |                |
| Pseudo word (reference)              | 0.36                    | [-0.09; 0.82]         | .10            |
| Real word                            | 0.01                    | [-0.64; 0.65]         | .98            |
| <b>Talker number</b>                 |                         |                       |                |
| Talker number                        | 0.13                    | [-0.25; 0.50]         | .45            |
| <b>Talker presentation</b>           |                         |                       |                |
| <b>Blocked (reference)</b>           | <b>0.68</b>             | <b>[0.30; 1.07]</b>   | <b>.004**</b>  |
| <b>Intermixed</b>                    | <b>-0.50</b>            | <b>[-0.99; -0.02]</b> | <b>.045*</b>   |
| Target phone number                  | 0.04                    | [-0.30; 0.37]         | .80            |
| Phonetic context number              | 0.01                    | [-0.01; 0.03]         | .50            |

|                                 |        |                 |     |
|---------------------------------|--------|-----------------|-----|
| Training session number         | -0.03  | [-0.15; 0.09]   | .57 |
| Training session length         | 0.01   | [-0.01; 0.03]   | .19 |
| Token number per session        | -0.001 | [-0.009; 0.007] | .85 |
| Total token number              | -0.00  | [-0.001; 0.001] | .64 |
| Training program length         | 0.08   | [-0.06; 0.21]   | .21 |
| Training program time span      | 0.01   | [-0.02; 0.04]   | .40 |
| Sample size                     | -0.02  | [-0.05; 0.02]   | .25 |
| Test stimuli                    |        |                 |     |
| Trained + untrained (reference) | 0.21   | [-0.44; 0.86]   | .46 |
| Trained                         | 0.16   | [-0.64; 0.96]   | .64 |
| Untrained                       | 0.37   | [-0.65; 1.39]   | .41 |
| Study-related                   |        |                 |     |
| Year of publication             | -0.02  | [-0.08; 0.03]   | .36 |
| Source of publication           |        |                 |     |
| Conference (reference)          | 0.26   | [-0.55; 1.07]   | .47 |
| Dissertation                    | 0.30   | [-0.81; 1.42]   | .53 |
| Journal                         | 0.08   | [-0.85; 1.00]   | .85 |
| Study quality                   | -0.45  | [-6.24; 5.35]   | .86 |
