# Supplementary material
Source: publisher figshare collection journal article supplement (https://asha.figshare.com/articles/dataset/_/16959388)
Supplement: Supplementary file 3 [file 2]

**Supplemental Table S3.** Overall benefit of talker variability.

|    | First Author and Year | Hedge’s g | variance | 95% CI         | Participant number | Quality score | Mean difference between pre-post-tests (SD)                         |                                                     |
|----|-----------------------|-----------|----------|----------------|--------------------|---------------|---------------------------------------------------------------------|-----------------------------------------------------|
|    |                       |           |          |                |                    |               | MT                                                                  | ST                                                  |
| 1  | Brosseau-Lapré_2013   | 0.12      | 0.19     | [-0.75; 0.98]  | MT(10)-ST(10)      | 0.85          | Per: 0.07 (0.13)                                                    | Per: 0.06 (0.13)                                    |
| 2  | Davis_2015:1          | -1.35     | 0.16     | [-2.15; -0.56] | MT(11)-ST(15)      | 0.81          | Per: 0.61 (0.04)<br>Pro: 0.40 (0.05)                                | Per: 0.65 (0.03)<br>Pro: 0.48 (0.05)                |
| 3  | Davis_2015:2          | 3.63      | 0.86     | [1.81; 5.44]   | MT(9)-ST(5)        | 0.81          | Per: 0.58 (0.04)<br>Pro: 0.31 (0.06)                                | Per: 0.40 (0.06)<br>Pro: 0.10 (0.05)                |
| 4  | Deng_2018             | 0.08      | 0.13     | [-0.61; 0.78]  | MT(16)-ST(16)      | 0.83          | Per: F stats(0.06)                                                  |                                                     |
| 5  | Dong_2019             | -0.07     | 0.05     | [-0.53; 0.38]  | MT(20)-ST(20)      | 0.92          | Per: 0.89 (0.32)<br>0.07 (0.49)<br>Pro: 0.46 (0.50)<br>0.001 (0.43) | Per: 0.88 (0.32)<br>0.07 (0.49)<br>Pro: 0.09 (0.46) |
| 6  | Giannakopoulou_2017   | 0.08      | 0.07     | [-0.43; 0.58]  | MT(22)-ST(19)      | 0.90          | Per: 0.07 (0.43)                                                    | Per: 0.04 (0.42)                                    |
| 7  | Hardison_2003         | 1.01      | 0.29     | [-0.04; 2.06]  | MT(8)-ST(8)        | 0.92          | Per: F stats (4.58)                                                 |                                                     |
| 8  | Lee_2007              | 0.26      | 0.09     | [-0.32; 0.83]  | Total(47)          | 0.79          | Per: F stats (0.812)                                                |                                                     |
| 9  | MacDonald_2012        | 0.59      | 0.10     | [-0.02; 1.21]  | MT(14)-ST(14)      | 0.88          | Per: 0.09 (0.09)<br>0.06 (0.16)                                     | Per: 0 (0.10)<br>0.03 (0.06)                        |
| 10 | Perrachione_2011:1    | 1.28      | 0.22     | [0.37; 2.20]   | MT(10)-ST(16)      | 0.83          | Per: 0.97 (0.03)                                                    | Per: 0.88 (0.08)                                    |
| 11 | Perrachione_2011:2    | 0.38      | 0.18     | [-0.45; 1.22]  | MT(10)-ST(16)      | 0.83          | Per: 0.75 (0.17)                                                    | Per: 0.68 (0.17)                                    |
| 12 | Shehata_2013          | 4.51      | 0.49     | [3.14; 5.89]   | MT(15)-ST(15)      | 0.81          | Per: F stats (161.398)                                              |                                                     |
| 13 | Silpachai_2020        | 1.19      | 1.20     | [-0.96; 3.34]  | MT(14)-ST(13)      | 0.94          | Per: 0.41 (0.12)                                                    | Per: 0.28 (0.09)                                    |

|    |               |       |      |               |               |      |                                                               |                                                               |
|----|---------------|-------|------|---------------|---------------|------|---------------------------------------------------------------|---------------------------------------------------------------|
| 14 | Wiener_2020:1 | -0.03 | 0.07 | [-0.53; 0.48] | MT(20)-ST(20) | 0.88 | Pro: 0.93 (0.26)<br>0.66 (0.47)<br>0.59 (0.49)<br>0.91 (0.28) | Pro: 0.93 (0.25)<br>0.67 (0.47)<br>0.60 (0.49)<br>0.93 (0.26) |
| 15 | Wiener_2020:2 | -0.12 | 0.07 | [-0.63; 0.38] | MT(20)-ST(20) | 0.88 | Pro: 0.80 (0.40)<br>0.60 (0.49)<br>0.44 (0.50)<br>0.77 (0.42) | Pro: 0.86 (0.35)<br>0.67 (0.47)<br>0.47 (0.50)<br>0.83 (0.38) |
| 16 | Wong_2013     | 0.14  | 0.78 | [-1.59; 1.86] | MT(9)-ST(7)   | 0.94 | Per: 0.25 (0.09)<br>0.19 (0.06)<br>0.15 (0.11)                | Per: 0.33 (0.16)<br>0.16 (0.03)<br>0.24 (0.13)                |
| 17 | Zhang_2021:1  | 0.001 | 0.07 | [-0.53; 0.53] | MT(20)-ST(20) | 0.94 | Pro: 0.25 (0.21)<br>0.28 (0.11)<br>0.16 (0.07)                | Pro: 0.13 (0.18)<br>0.17 (0.19)<br>0.13 (0.05)                |
| 18 | Zhang_2021:2  | 0.46  | 0.12 | [-0.22; 1.14] | MT(20)-ST(20) | 0.94 | Per: 0.16 (0.15)<br>Pro: -0.01 (0.10)                         | Per: 0.17 (0.17)<br>Pro: -0.02 (0.13)                         |
|    |               |       |      |               |               |      | Per: 0.14 (0.13)                                              | Per: 0.09 (0.11)                                              |
