# Supplementary material
Source: publisher figshare collection journal article supplement (https://asha.figshare.com/articles/dataset/_/16959388)
Supplement: Supplementary file 5 [file 2]

**Supplemental Table S4.** Effects of talker variability on generalization and retention.

|                                        | First Author and Year | Hedge’s g | variance | 95% CI        | Participant number | Mean difference between pre-post-tests (SD) |                                             |
|----------------------------------------|-----------------------|-----------|----------|---------------|--------------------|---------------------------------------------|---------------------------------------------|
|                                        |                       |           |          |               |                    | MT                                          | ST                                          |
| Studies testing generalization effects |                       |           |          |               |                    |                                             |                                             |
| 1                                      | Deng_2018             | -0.08     | 0.13     | [-0.80; 0.63] | MT(16)-ST(16)      | 0.60 (0.23)                                 | 0.62 (0.24)                                 |
| 2                                      | Lee_2007              | 0.26      | 0.09     | [-0.32; 0.83] | Total(47)          | Per: F stats (0.812)                        |                                             |
| 3                                      | MacDonald_2012        | 0.59      | 0.10     | [-0.02; 1.21] | MT(14)-ST(14)      | 0.09 (0.09)<br>0.06 (0.16)                  | 0 (0.10)<br>0.03 (0.06)                     |
| 4                                      | Perrachione_2011:1    | 1.28      | 0.22     | [0.37; 2.19]  | MT(10)-ST(16)      | 0.97 (0.25)                                 | 0.88 (0.08)                                 |
| 5                                      | Perrachione_2011:2    | 0.38      | 0.18     | [-0.45; 1.22] | MT(10)-ST(16)      | 0.75 (0.17)                                 | 0.68 (0.17)                                 |
| 6                                      | Shehata_2013          | 4.51      | 0.49     | [3.14; 5.89]  | MT(15)-ST(15)      | Per: F stats (161.398)                      |                                             |
| 7                                      | Silpachai_2020        | 0.50      | 1.10     | [-1.55; 2.56] | MT(14)-ST(13)      | 0.35 (0.12)                                 | 0.30 (0.09)                                 |
| 8                                      | Wong_2013             | 0.43      | 0.47     | [-0.91; 1.78] | MT(9)-ST(7)        | 0.15 (0.09)<br>0.13 (0.06)<br>0.12 (0.11)   | 0.21 (0.17)<br>0.07 (0.03)<br>0.04 (0.13)   |
| 9                                      | Zhang_2021:1          | -0.06     | 0.13     | [-0.76; 0.65] | MT(20)-ST(20)      | 0.16 (0.15)                                 | 0.17 (0.17)                                 |
| 10                                     | Zhang_2021:2          | 0.46      | 0.12     | [-0.22; 1.14] | MT(20)-ST(20)      | 0.14 (0.13)                                 | 0.09 (0.11)                                 |
| Studies testing retention effects      |                       |           |          |               |                    |                                             |                                             |
| 1                                      | MacDonald_2012        | 1.04      | 0.14     | [0.31; 1.77]  | MT(10)-ST(12)      | 0.08 (0.09)<br>0.08 (0.16)<br>0.27 (0.21)   | -0.04 (0.10)<br>-0.02 (0.06)<br>0.07 (0.15) |
| 2                                      | Silpachai_2020        | 1.58      | 1.35     | [-0.69; 3.85] | MT(9)-ST(7)        | 0.25 (0.15)<br>0.44 (0.22)<br>0.67 (0.06)   | 0.11 (0.15)<br>0.31 (0.20)<br>0.37 (0.08)   |
