# Supplementary material
Source: publisher figshare collection journal article supplement (https://asha.figshare.com/articles/dataset/_/16959388)

Supplemental Figure S2. Funnel plot. Effect size for each study (Hedge's  $g$ ) is plotted against the standard error.

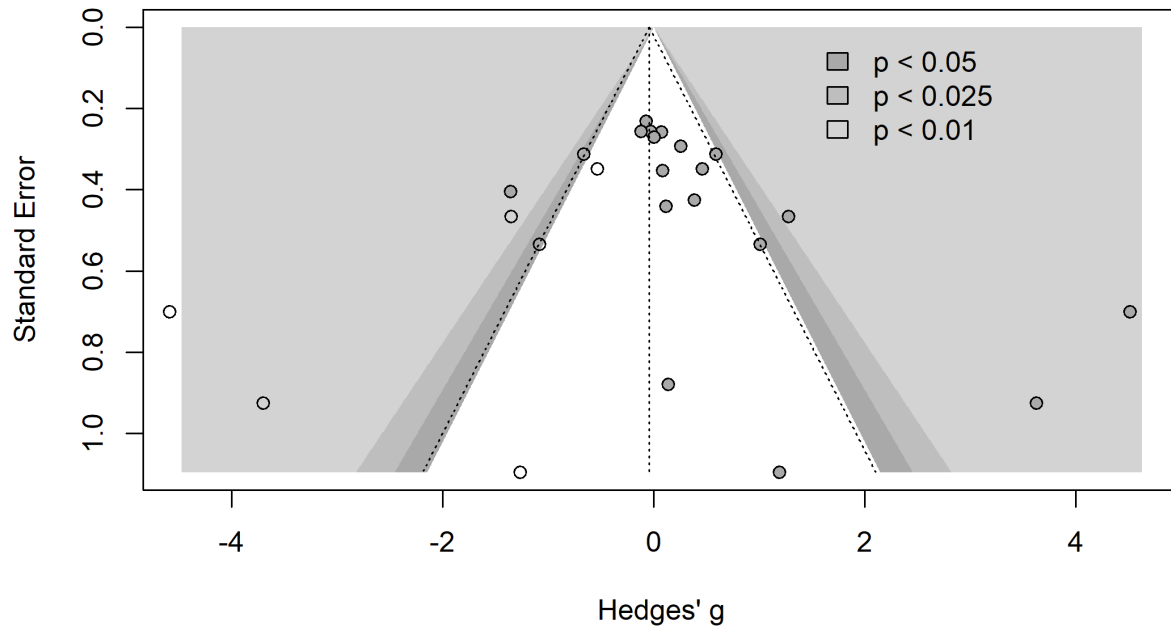

Supplement: Supplementary file 6 [file 2]
