# Supplementary material
Source: publisher figshare collection journal article supplement (https://asha.figshare.com/articles/dataset/_/16959388)
Supplement: Supplementary file 7 [file 2]

**Supplemental Table S5.** Results of the meta-regression analyses on immediate perceptual gains.

| Moderator                            | Coefficient ( $\beta$ ) | 95% CI         | <i>p</i> value |
|--------------------------------------|-------------------------|----------------|----------------|
| <b>Participant-related</b>           |                         |                |                |
| Mean age                             | -0.06                   | [-0.14; 0.02]  | .10            |
| L2 proficiency                       |                         |                |                |
| Advanced (reference)                 | 0.06                    | [-0.52; 0.64]  | .83            |
| Intermediate                         | 0.38                    | [-0.334; 1.10] | .26            |
| Beginner                             | 0.21                    | [-0.45; 0.87]  | .50            |
| L1                                   |                         |                |                |
| Chinese (reference)                  | 0.19                    | [-0.37; 0.75]  | .46            |
| English                              | 0.13                    | [-0.50; 0.76]  | .66            |
| Greek                                | -0.11                   | [-0.93; 0.70]  | .76            |
| Korean                               | 0.82                    | [-0.51; 2.16]  | .20            |
| <b>Methodology-related</b>           |                         |                |                |
| Target phone                         |                         |                |                |
| Consonants (reference)               | 1.01                    | [-0.17; 2.19]  | .09            |
| Tone                                 | -0.74                   | [-1.96; 0.49]  | .21            |
| Vowel                                | -0.78                   | [-2.00; 0.45]  | .19            |
| Target language                      |                         |                |                |
| Artificial tone language (reference) | 0.79                    | [0.13; 1.46]   | .03            |
| Chinese                              | -0.66                   | [-1.41; 0.10]  | .08            |
| English                              | -0.57                   | [-1.33; 0.18]  | .12            |
| French                               | -0.36                   | [-1.22; 0.50]  | .37            |
| Training task type                   |                         |                |                |
| Identification (reference)           | 0.31                    | [0.05; 0.56]   | .02            |
| Passive listening                    | -0.10                   | [-0.72; 0.54]  | .75            |
| Training stimulus type               |                         |                |                |
| Pseudo word (reference)              | 0.40                    | [-0.02; 0.81]  | .06            |
| Real word                            | -0.16                   | [-0.65; 0.33]  | .49            |
| Talker number                        |                         |                |                |
| Talker presentation                  | 0.17                    | [-0.16; .50]   | .29            |
| Blocked (reference)                  | 0.47                    | [0.14; 0.79]   | .01            |

|                                             |             |                      |            |
|---------------------------------------------|-------------|----------------------|------------|
| Intermixed                                  | -0.31       | [-0.74; 0.11]        | .13        |
| Target phone number                         | -0.01       | [-0.27; 0.25]        | .93        |
| Phonetic context number                     | 0.01        | [-0.002; 0.2]        | .09        |
| Training session number                     | 0.02        | [-0.06; 0.11]        | .57        |
| Training session length                     | 0.01        | [-0.005; 0.3]        | .15        |
| Token number per session                    | -0.001      | [-0.003; 0.00]       | .14        |
| Total token number                          | -0.00       | [-0.001; 0.00]       | .16        |
| <b>Training program length</b>              | <b>0.10</b> | <b>[-0.01; 0.21]</b> | <b>.07</b> |
| Training program time span                  | 0.01        | [-0.01; 0.03]        | .36        |
| Sample size                                 | -0.02       | [-0.04; 0.003]       | .08        |
| Test task                                   |             |                      |            |
| Identification + discrimination (reference) | 0.01        | [-0.54; 0.55]        | .99        |
| Identification                              | 0.39        | [-0.21; 0.99]        | .18        |
| Discrimination                              | 0.07        | [-0.70; 0.84]        | .84        |
| Test stimuli                                |             |                      |            |
| Trained + untrained (reference)             | 0.14        | [-0.19; 0.48]        | .37        |
| Trained                                     | 0.11        | [-0.34; 0.56]        | .60        |
| Untrained                                   | 0.59        | [-0.04; 1.21]        | .06        |
| Test talker                                 |             |                      |            |
| Trained + untrained (reference)             | 0.14        | [-0.22; 0.50]        | .41        |
| Trained                                     | -0.41       | [-2.96; 2.15]        | .73        |
| Untrained                                   | 0.25        | [-0.22; 0.72]        | .26        |
| Study-related                               |             |                      |            |
| Year of publication                         | -0.04       | [-0.07; 0.01]        | .08        |
| Source of publication                       |             |                      |            |
| Conference (reference)                      | 0.26        | [-0.46; 0.98]        | .44        |
| Dissertation                                | 0.27        | [-0.76; 1.29]        | .58        |
| Journal                                     | 0.01        | [-0.76; 0.78]        | .99        |
| Study quality                               | -1.31       | [-6.13; 3.50]        | .56        |
