# Supplementary material
Source: publisher figshare collection journal article supplement (https://asha.figshare.com/articles/dataset/_/16959388)
Supplement: Supplementary file 8 [file 2]

**Supplemental Table S2.** Characteristics of studies included in quantitative synthesis.

| No | First author<br>Year     | Participant information |                                      |              |                           |                       |             | Training design                |                               |                           | Perception measure         |           |                | Production measure |                       |                 |
|----|--------------------------|-------------------------|--------------------------------------|--------------|---------------------------|-----------------------|-------------|--------------------------------|-------------------------------|---------------------------|----------------------------|-----------|----------------|--------------------|-----------------------|-----------------|
|    |                          | Source                  | TL<br>(L1)                           | Proficiency  | Sample<br>size<br>(MT:ST) | Sex<br>ratio<br>(M:F) | Mean<br>age | Target<br>phones               | Task<br>paradigm<br>(stimuli) | Talker<br>number<br>in MT | Training<br>length<br>(hr) | Test task | Talker<br>type | Stimuli<br>type    | Elicitation<br>prompt | Stimuli<br>type |
| 1  | Brousseau-Lapr e<br>2013 | J                       | French<br>(English)                  | Beginner     | 10:10                     | N/A                   | 26          | /ə/-/ɑ/                        | I<br>(real)                   | 5                         | 1                          | I         | B              | B                  | N/A                   | N/A             |
| 2  | Davis 2015:1             | D                       | English<br>(Chinese)                 | Advanced     | 11:15                     | N/A                   | N/A         | /r/-/l/<br>/f/-/s/             | PL<br>(pseudo)                | 10                        | N/A                        | I         | T              | T                  | picture               | T               |
| 3  | Davis 2015:2             | D                       | English<br>(Chinese)                 | Intermediate | 9:5                       | N/A                   | N/A         | /r/-/l/<br>/f/-/s/             | PL<br>(pseudo)                | 10                        | N/A                        | I         | T              | T                  | picture               | T               |
| 4  | Deng 2018                | J                       | Chinese<br>(English)                 | Beginner     | 16:16                     | 17:15                 | 25.63       | T1, T2<br>T3, T4               | I<br>(pseudo)                 | 4                         | 4.5                        | I         | U              | T                  | N/A                   | N/A             |
| 5  | Dong 2019                | J                       | Chinese<br>(most English)            | Beginner     | 20:20                     | N/A                   | 24.62       | T1, T2<br>T3, T4               | I<br>(real)                   | 4                         | 3                          | B         | B              | B                  | picture               | B               |
| 6  | Giannakopoulou<br>2017   | J                       | English<br>(Greek)                   | Advanced     | 22:19                     | 10:31                 | 24.3        | /i/-/I/                        | I<br>(real)                   | 4                         | N/A                        | D         | B              | B                  | N/A                   | N/A             |
| 7  | Hardison 2003            | J                       | English<br>(Korean)                  | Intermediate | 8:8                       | N/A                   | N/A         | /r/-/l/                        | I<br>(real)                   | 5                         | 4.5                        | I         | B              | U                  | N/A                   | N/A             |
| 8  | Lee 2007                 | C                       | Chinese<br>(English)                 | Beginner     | 47 (no<br>details)        | N/A                   | 21.6        | T1, T2,<br>T4                  | I<br>(pseudo)                 | 4                         | 4                          | I         | U              | T                  | N/A                   | N/A             |
| 9  | Macdonald 2012           | D                       | French<br>(English)                  | Intermediate | 14:14                     | N/A                   | 20          | /u/-/y/<br>/ɑ/-/ɔ/             | I<br>(real)                   | 6                         | N/A                        | I         | U              | U                  | N/A                   | N/A             |
| 10 | Perrachione 2011:1       | J                       | Pseudo tone<br>language<br>(English) | Beginner     | 10:16                     | N/A                   | N/A         | LT, RT, FT                     | I<br>(pseudo)                 | 4                         | 8                          | I         | U              | T                  | N/A                   | N/A             |
| 11 | Perrachione 2011:2       | J                       | Pseudo tone<br>language<br>(English) | Beginner     | 10:16                     | N/A                   | N/A         | LT, RT, FT                     | I<br>(pseudo)                 | 4                         | 8                          | I         | U              | T                  | N/A                   | N/A             |
| 12 | Shehata 2013             | D                       | Arabic<br>(English)                  | Beginner     | 15:15                     | 11:19                 | N/A         | /h/-/h/                        | PL<br>(pseudo)                | 3                         | 0.75                       | D         | U              | T                  | N/A                   | N/A             |
| 13 | Silpachai 2020           | J                       | Chinese<br>(English)                 | Beginner     | 14:13                     | 10:17                 | 21.7        | T1, T2<br>T3, T4               | I<br>(real)                   | 4                         | 4-8                        | I         | U              | U                  | N/A                   | N/A             |
| 14 | Wiener 2020:1            | J                       | Chinese<br>(English)                 | Intermediate | 20:20                     | N/A                   | 21.4        | T1, T2<br>T3, T4               | PL<br>(pseudo)                | 4                         | 2                          | N/A       | N/A            | N/A                | AO                    | T               |
| 15 | Wiener 2020:2            | J                       | Chinese<br>(English)                 | Beginner     | 20:20                     | N/A                   | 21.4        | T1, T2<br>T3, T4               | PL<br>(pseudo)                | 4                         | 2                          | N/A       | N/A            | N/A                | AO                    | T               |
| 16 | Wong 2013                | D                       | English<br>(Chinese)                 | Advanced     | 9:7                       | 5:11                  | 16.3        | /i/-/I/, /e/-<br>/æ/, /o/-/u:/ | I<br>(real)                   | 6                         | 2.5                        | I         | T              | T                  | orthograp<br>hic      | T               |
| 17 | Zhang 2021:1             | J                       | English<br>(Chinese)                 | Intermediate | 20:20                     | N/A                   | 21          | /i/-/I/                        | PL<br>(real)                  | 4                         | 1-1.5                      | I         | U              | B                  | orthograp<br>hic      | B               |
| 18 | Zhang 2021:2             | J                       | English<br>(Chinese)                 | Intermediate | 20:20                     | N/A                   | 21          | /i/-/I/                        | PL<br>(real)                  | 4                         | 1-1.5                      | I         | U              | B                  | N/A                   | N/A             |

*Note.* (1) Abbreviations: J=journal; D=dissertation; C=conference; T1=Mandarin tone 1; T2= Mandarin tone 2; T3= Mandarin tone 3; T4= Mandarin tone 4; I=identification; D=discrimination; PL=passive listening; T=trained; U=untrained; B=both; P=picture; A=auditory; O= orthographic; N/A=not available. (2) Information involves only the task included in the quantitative synthesis.
