# Supplementary material
Source: publisher figshare collection journal article supplement (https://asha.figshare.com/articles/dataset/_/16959388)

Supplemental Figure S1. Results of influential analysis.

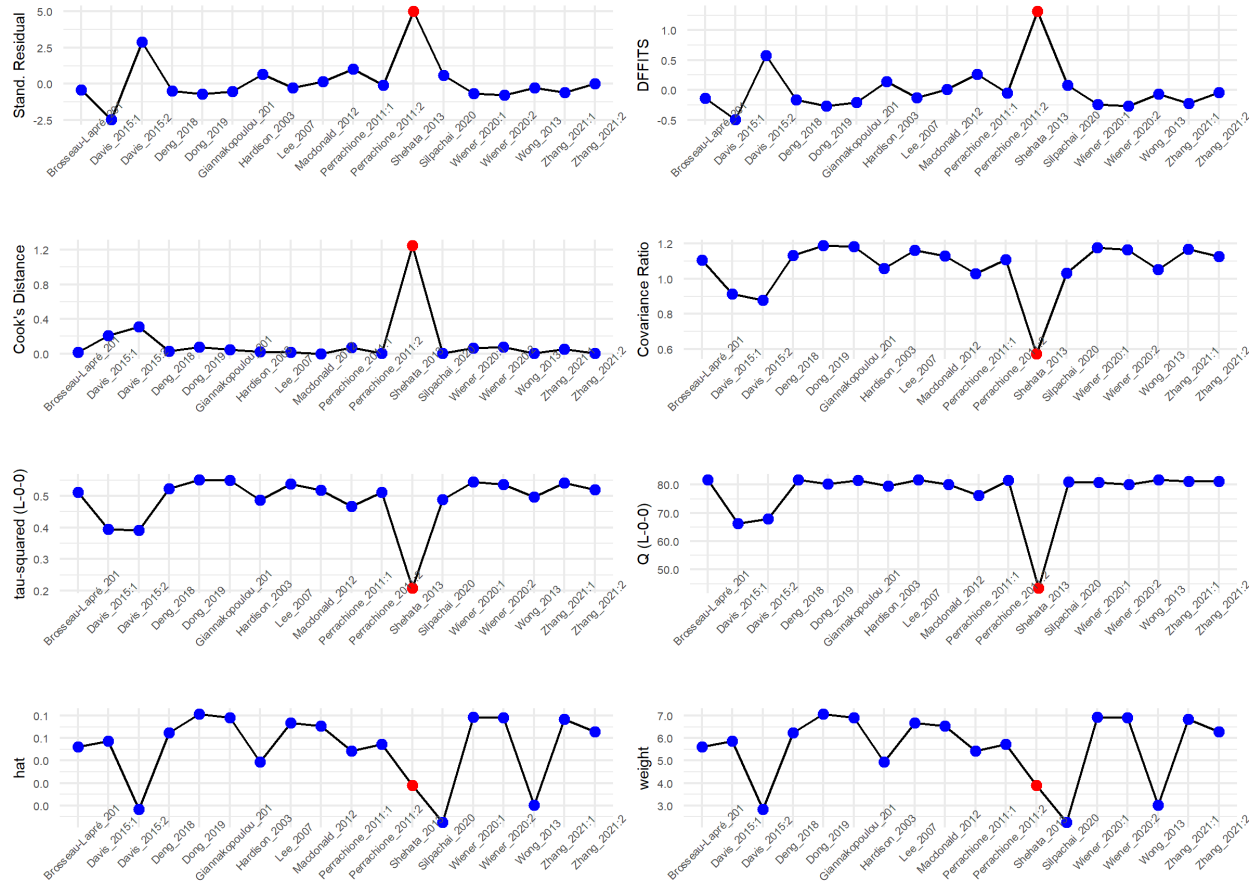

Supplement: Supplementary file 1 [file 2]
